# Small-molecule-mediated OGG1 inhibition attenuates pulmonary inflammation and lung fibrosis

L. Tanner<sup>1\*</sup>, A.B. Single<sup>1</sup>, R.K.V Bonghir<sup>1</sup>, R. Oomen<sup>2</sup>, O. Wallner<sup>2</sup>, T. Helleday<sup>2,3</sup>, C. Kalderen<sup>2</sup>, A. Egesten<sup>1</sup>

<sup>1</sup>Respiratory Medicine & Allergology, Department of Clinical Sciences Lund, Lund University and Skåne University Hospital, Lund.

<sup>2</sup>Science for Life Laboratory, Department of Oncology-Pathology, Karolinska Institutet, S-171 76 Stockholm, Sweden.

<sup>3</sup>Sheffield Cancer Centre, Department of Oncology and Metabolism, University of Sheffield, Sheffield S10 2RX, UK.

## \*Correspondence to:

Lloyd Tanner ([lloyd.tanner@med.lu.se](mailto:lloyd.tanner@med.lu.se)) Biomedical Center, Tornavägen 10, SE-221 84 Lund, Sweden.

## Abstract

Interstitial lung diseases such as idiopathic pulmonary fibrosis (IPF) are caused by persistent micro-injuries to alveolar epithelial tissues together with aberrant repair processes. Despite substantial advancement in our understanding of IPF progression, numerous questions remain concerning disease pathology. IPF is currently treated with pirfenidone and nintedanib, compounds which slow the rate of disease progression but fail to treat underlying causes of disease. The DNA repair enzyme 8-oxoguanine DNA glycosylase-1 (OGG1) is upregulated following TGF- $\beta$  exposure in several fibrosis-associated cell types. Currently, no pharmaceutical solutions targeting OGG1 have been utilized in the treatment of IPF. In this study, a novel small molecule OGG1 inhibitor, TH5487, decreased myofibroblast transition and associated pro-fibrotic markers in fibroblast cells. In addition, TH5487 decreased pro-inflammatory cytokine production, inflammatory cell infiltration, and lung remodeling in a murine model of bleomycin-induced pulmonary fibrosis. Taken together, these data strongly suggest that TH5487 is a potent, specific, and clinically-relevant treatment for IPF.

## 1 Introduction

2 Idiopathic pulmonary fibrosis (IPF) is a disorder characterized by progressive lung scarring with a median  
3 survival time of 3 years post-diagnosis (1–3). The disease is associated with increasing cough and dyspnea,  
4 affecting approximately 3 million people worldwide, with incidence strongly correlated with increasing age  
5 (4). IPF is defined on the histological basis of usual interstitial pneumonia (UIP), with UIP usually  
6 presenting as ‘honeycombing’ and peripheral alveolar septal thickening (5). Fibroblast and myofibroblast  
7 overactivation/overstimulation results in extracellular matrix (ECM) deposition in alveolar walls, reducing  
8 alveolar spaces (6). Current IPF therapies focus on inhibiting collagen deposition by blocking myofibroblast  
9 activation. These approaches have shown limited success in achieving overall IPF resolution, highlighting  
10 the need for novel therapeutic strategies (4, 7).

11 Injured IPF tissues produce reactive oxygen species (ROS), resulting in DNA damage and the upregulation  
12 of fibrotic-related pathways, ultimately leading to lung architecture collapse (8, 9). The DNA base guanine  
13 is particularly prone to oxidation, forming 7,8-dihydro-8-oxoguanine (8-oxoG). 8-oxoG bases are  
14 recognized by the enzyme 8-oxoG DNA glycosylase 1 (OGG1), whereby OGG1 binding triggers DNA  
15 base excision processes. It has been shown that *Ogg1*-deficient (*Ogg1*<sup>-/-</sup>) mice are resistant to DNA damage  
16 inducing agents (10). Furthermore, the increased expression of OGG1 is an important marker of  
17 inflammation and resultant fibrotic processes (11, 12).

18 Following lung injury, fibroblasts transition to myofibroblasts through stimulatory factors such as TGF- $\beta$ 1,  
19 which further induce the production of fibrotic markers including alpha smooth muscle actin ( $\alpha$ -SMA),  
20 collagen, and fibronectin (13, 14). The fibroblast to myofibroblast transition and migratory activities are  
21 well established hallmarks of IPF (15, 16).

22 Interestingly, siRNA-mediated *Ogg1* knockdown in murine embryonic fibroblast cells revealed decreased  
23 levels of tissue-associated  $\alpha$ -SMA (17). OGG1’s implication in fibrogenesis, combined with its role in  
24 inflammation, highlights this enzyme as a therapeutic target for IPF treatment (18). Thus, we hypothesize  
25 that efficacy of a previously identified, potent, and selective OGG1 inhibitor (TH5487) may show promise  
26 in a murine model of IPF. In this study, we used a 21-day intratracheally bleomycin-challenged murine  
27 model to confirm TH5487 efficacy *in vivo*. This model reproduces several phenotypic features of human  
28 IPF, including peripheral alveolar septal thickening and acute cytokine production resolving in fibrosis (19,  
29 20).

30

## 31 Methods

### 32 Cell culture

33 Murine C57BL/6 embryonic lung fibroblasts (MEF’s; ATCC, Manassa, VA) and HFL-1 cells were cultured  
34 in complete growth medium supplemented with L-glutamine, 100 U/mL penicillin, 100  $\mu$ g/mL  
35 streptomycin, and 10% FBS. A549 cells were cultured in RPMI 1640 with the addition of 10% FCS, and  
36 100U/mL penicillin, 100  $\mu$ g/mL streptomycin. Finally, BEAS 2B cells were cultured in RPMI-glutamax  
37 and 10% FBS, with the addition of 100 U/mL penicillin and 100  $\mu$ g/mL streptomycin.

38

39

40

## 41 **Wound healing assay**

42 Wound healing assays were conducted using A549, murine lung fibroblast (MEF), BEAS 2B, and HFL-1  
43 cells grown to confluence in 24-well plates. Wounds were made in the confluent cell layer using sterile 200  
44  $\mu$ L pipette tips, followed by washing with PBS and incubation with complete culture medium with or  
45 without TGF- $\beta$ 1 (10 ng/mL) at 37 °C in a 5 % CO<sub>2</sub> incubator for 48 h post-scratching. Cell images were  
46 monitored every 24 h using an Olympus CKX41 microscope with Olympus SC30 camera and cellSens  
47 Entry software (Olympus, Tokyo, Japan). Images were analyzed using the wound healing tool in ImageJ.  
48 Data are presented as percentages of the initial wound area.

## 49 **Immunostaining of HFL-1 cells**

50 HFL-1 cells were seeded (1 x 10<sup>4</sup> cells/mL) into 24 well plates containing rounded glass cover slips. TGF-  
51  $\beta$ 1 (10 ng/mL) was added to each well, followed by the addition of medium containing TH 5487,  
52 dexamethasone, medium only, or vehicle only. Following 96 h of treatment, cells were washed and fixed  
53 with ice cold methanol, containing 0.5% Triton-X100. Slides were blocked using Dako Protein Block  
54 (Agilent, CA, USA) for 1 h at room temperature and then stained with primary antibodies overnight, rabbit  
55 anti-COL I, rabbit anti- $\alpha$ SMA, rabbit anti-fibronectin (Abcam, CAM, UK), and rabbit anti-OGG1  
56 (Invitrogen, Carlsbad, CA) antibodies were used. AlexaFluor 488-conjugated goat anti-rabbit antibody  
57 (Invitrogen, CA, USA) was used as secondary antibody. Glass cover slips were removed and mounted onto  
58 glass slides, with nuclei counterstained using DAPI-containing fluoroshield (Abcam). Images were  
59 visualized using a Nikon Confocal Microscope.

60

## 61 **Fibroblast transwell experiment**

62 Fibroblast chemotaxis was measured using 24-well Nunc (8  $\mu$ m pore size) transwell inserts (ThermoFisher,  
63 MA, USA). HFL-1 cells were seeded (5 x 10<sup>5</sup> cells/ml) into the upper chamber in FBS-free medium, whilst  
64 the lower chamber contained complete medium with additional 10 % FBS as a chemoattractant. Medium  
65 containing TGF- $\beta$ 1 (10 ng/mL) was added to each well and allowed to equilibrate for 24 h. Cells were  
66 washed with PBS, followed by the addition of medium containing TH5487, dexamethasone, medium only,  
67 or vehicle only (DMSO 2% and PBS pH 7.4), with the replacement of each every 24 h. Following 96 h,  
68 medium was removed and cells in the lower chamber were stained (crystal violet) and imaged using a Nikon  
69 microscope with a x10 objective.

## 70 **mRNA analysis**

71 HFL-1 cells were starved in culture medium with 0.5% BSA for 24 h. Cells were pretreated with TH5487,  
72 5  $\mu$ M, 10  $\mu$ M or DMSO for one hour followed by TGF- $\beta$  stimulation (10 ng/ml, Peprotech) for 48 hours.  
73 mRNA was extracted based on the RNA extraction kit protocol Direct-zol RNA MiniPrep (Zymo research).

74 cDNA synthesis was performed using Quantitect Reverse Transcription kit (Qiagen) and quantified with  
75 the iTaq™ Universal SYBR® Green Supermix PCR Kit in Rotor Gene Q (Qiagen). Using the following  
76 pcr primers, Human Col1A1F, 5'GATTCCCTGGACCTAAAGGTGC3', Human Col1A1R,  
77 5'AGCCTCTCCATCTTTGCCAGCA3', Human  $\alpha$ -SMAF, 5'CTATGCCTCTGGACGCACAACT3',  
78 Human  $\alpha$ -SMAR 5'CAGATCCAGACGCATGATGGCA3', 18SrRNAF:  
79 5'AGTCCCTGCCCTTTGTACACA 3', 18SrRNAR: 5'GATCCGAGGGCCTCACTAAAC 3'

80 The obtained Ct values of the samples were normalized to the Ct values of 18SRNA reference gene, 2-  
81  $\Delta\Delta$ Ct values were calculated using Microsoft Excel.

82

## 83 **Ethical approval**

84 All animal experiments were approved by the Malmö-Lund Animal Care Ethics Committee (M17009-18).

## 85 **Animals**

86 10-12-week-old male C57Bl/6 mice (Janvier, Le Genest-Saint-Isle, France) were housed at least 2 weeks  
87 in the animal facility at the Biomedical Service Division at Lund University before initiating experiments  
88 and were provided with food and water *ad libitum* throughout the study. Mice were randomly allocated into  
89 five groups: intratracheally (i.t.)-administered bleomycin (2.5 U/kg) + vehicle intraperitoneal (i.p.),  
90 bleomycin (i.t.) + TH5487 (40 mg/kg; i.p.), bleomycin (i.t.) + dexamethasone (10 mg/kg; i.p.), saline (i.t.)  
91 + vehicle (i.p.), and saline (i.t.) + TH5487 (40 mg/kg; i.p.).

## 92 **Blood collection**

93 Blood was collected in 0.5 M EDTA tubes by cardiac puncture and centrifuged at 1,000 g for 10 min.  
94 Plasma supernatant was used for the analysis of inflammatory mediators using a bioplex assay.

## 95 **Collection of lung tissue**

96 Right lungs were collected in Eppendorf tubes on dry ice and stored at -80 °C. The snap-frozen lungs were  
97 thawed and homogenized in tissue protein extraction reagent (T-PER) solution (ThermoFisher) containing  
98 protease inhibitor (Pefabloc SC; Sigma-Aldrich) at a final concentration of 1 mM. Lung homogenates were  
99 centrifuged at 9,000 g for 10 min at 4°C, and the supernatants were collected for bioplex analysis. Left  
100 lungs were collected in Histofix (Histolab, Göteborg, Sweden) and submerged in 4 % buffered  
101 paraformaldehyde solution.

## 102 **Bronchoalveolar lavage fluid (BALF) collection**

103 BAL was performed with a total volume of 1 ml PBS containing 100 µM EDTA. BALF was collected in  
104 Eppendorf tubes on ice, with aliquots made for flow cytometry, cytospin differential counts, and an aliquot  
105 transferred to -80°C for bioplex cytokine analysis. Cytospin preparations of cells were stained with  
106 modified Wright-Giemsa stain (Sigma-Aldrich, St. Louis, MO).

## 107 **Bioplex cytokine analysis**

108 For the detection of multiple cytokines in BALF, plasma, and lung homogenate, the Bio-Plex Pro mouse  
109 cytokine assay (23-Plex Group I; Bio-Rad) was used on a Luminex-xMAP/Bio-Plex 200 System with Bio-  
110 Plex Manager 6.2 software (Bio-Rad, Richmond, CA). A cytometric magnetic bead-based assay was used  
111 to measure cytokine levels, according to the manufacturer's instructions. The detection limits were as  
112 follows: Eotaxin (4524.58-1.23 pg/mL), GCSF (99318.6-7.3 pg/mL), GMCSF (6310.48-3.91 pg/mL), IFN-  
113  $\gamma$  (16114.01-0.87 pg/mL), IL-1 $\alpha$  (10055.54-0.54 pg/mL), IL-1 $\beta$  (31512.04-1.75 pg/mL), IL-2 (19175.48-  
114 1.24 pg/mL), IL-3 (7514.5-0.44 pg/mL), IL-4 (5923.58-0.34 pg/mL), IL-5 (12619.59-0.78 pg/mL), IL-6  
115 (9409.63-0.68 pg/mL), IL-9 (64684.09-2.41 pg/mL), IL-10 (77390.75-4.18 pg/mL), IL-12p40 (144560.15-  
116 18.62 pg/mL), IL-12p70 (78647.56-4.81 pg/mL), IL-13 (197828.67-11.16 pg/mL), IL-17 (8727.85-0.51  
117 pg/mL), KC (23001.9-1.4 pg/mL), MCP-1 (393545.52-10.01 pg/mL), MIP-1 $\alpha$  (14566.62-0.63 pg/mL),  
118 MIP-1 $\beta$  (7023.87-0.34 pg/mL), RANTES (19490.48-4.61 pg/mL), and TNF- $\alpha$  (74368.54-51.69 pg/mL).  
119 Cytokine measurements for lung homogenate samples were corrected for total protein concentration using  
120 a Pierce™ BCA Protein Assay Kit (ThermoFisher).

121

## 122 **TGF- $\beta$ 1 ELISA**

123 The Quantikine ELISA kit targeting TGF- $\beta$ 1 (R&D systems, UK) was used to assess TGF- $\beta$ 1 levels in the  
124 BALF, plasma, and lung homogenate of murine samples according to the manufacturer's instructions.  
125 Optical density was measured at 450 nm using a VICTOR 1420 Multilabel plate reader (Perkin Elmer, MA,  
126 USA).

## 127 **Flow cytometry**

128 Flow cytometry was carried out using a BD Accuri C6 Plus (BD Biosciences). The washed cells were  
129 incubated with Fixable Viability Stain 510 (FVS510; BD #564406) to differentiate live and dead cells. Cells  
130 were washed with Stain buffer 1x (BD #554656) and incubated with Lyse Fix 1x (BD #558049 (5x)). Fixed  
131 cells were washed with stain buffer and aliquoted into two samples incubated with either anti-CD11b  
132 (BD553312), anti-CD11c (BD558079), anti-Ly6G (BD551461), or anti-CD11c, anti-MHCII (BD558593),  
133 anti-SiglecF (BD562680) antibodies.

## 134 **H&E and picrosirius red staining of lung tissue**

135 Mouse left lungs were fixed in Histofix (Histolab Products AB, Askim, Sweden), paraffin-embedded and  
136 sectioned at 3  $\mu$ m. The tissue sections were placed on slides (Superfrost Plus; Fisher Scientific) and  
137 deparaffinized in serial baths of xylene and ethanol followed by staining using Mayer hematoxylin and  
138 0.2% eosin (Histolab Products AB, Askim, Sweden) or picrosirius red staining kit (Abcam, Cambridge,  
139 UK). The stained slides were imaged using an Aperio CS2 image capture device.

## 140 **SEM analysis of lung histology**

141 Lung tissue sections were fixed as reported above. After fixation, samples were washed and dehydrated in  
142 alcohol at increasing concentrations, critical point dried, mounted on aluminium holders, and covered with  
143 20 nm of gold. Samples were examined in a Philips XL30 FEG scanning electron microscope (Eindhoven,  
144 The Netherlands) operated at an acceleration voltage of 5 kV.

## 145 **Immunostaining of murine lung sections**

146 Lung tissue sections were fixed as reported above. Lung samples underwent antigen retrieval (pH9 buffer)  
147 using a Dako PT Link pre-treatment module (Agilent, CA, USA). Samples were washed and blocked for  
148 10 min (Dako protein block, Agilent, CA, USA) before being treated with primary antibodies overnight.  
149 Mouse anti-COL1A1, rabbit anti-fibronectin, rabbit anti-MPO (Abcam, CAM, UK), and rabbit anti-OGG1  
150 (Invitrogen, Carlsbad, CA) antibodies were used. Alexa Fluor 488-conjugated goat/anti-mouse and Alexa  
151 Fluor 647 goat/anti-rabbit (Invitrogen, CA, USA) were used as secondary antibodies. Glass cover slips were  
152 placed onto slides and mounted with DAPI-containing fluoroshield (Abcam). Images were visualized using  
153 a Nikon Confocal Microscope.

154

## 155 **Results**

### 156 **TH5487 reduced migratory capacity of lung-resident cells**

157 The migration of fibroblasts into the lung injury site is a key step in the pathogenesis of pulmonary fibrosis.  
158 The human HFL-1 and MEF cell lines were used for this analysis, alongside the alveolar epithelium-derived  
159 cell lines A549 and BEAS2B. Cells were grown to form a confluent monolayer, scratched to form a wound,  
160 then stimulated with 10 ng/mL TGF-B1 to induce cell migration and wound closure. The cells were  
161 additionally treated with TH5487 (10  $\mu$ M), vehicle, or dexamethasone (10  $\mu$ M) as a comparator drug. This

162 assay showed the wound area percentage in all cell types was significantly reduced following TGF- $\beta$ 1  
163 addition, indicating the expected pro-migratory effects of TGF-B1 stimulation (Figure 1A). TGF-B1-  
164 induced wound closure was inhibited by TH5487 treatment across all tested cell lines (Figure 1A).  
165 Interestingly, dexamethasone only inhibited cell migration in BEAS 2B and HFL-1 cells and showed  
166 minimal effects in A549 and mouse lung fibroblast cells. In summary, these results indicate TH5487 is  
167 capable of inhibiting TGF-B1-mediated migratory effects of lung-derived cells, including both human- and  
168 mouse-derived fibroblasts.

169

### 170 **TH5487 reduced HFL-1 myofibroblast transition, whilst targeting OGG1 production**

171 TGF- $\beta$ 1 driven fibrosis results in the transition of fibroblasts to myofibroblasts resulting in the production  
172 of fibrotic proteins. TH5487 treatment additionally reduced the production of collagen, fibronectin, and  $\alpha$ -  
173 smooth muscle actin, as measured by immunofluorescence and qPCR (Figure 1B and E). Compelling  
174 evidence of TH5487 involvement in OGG1 reduction is presented in Figure 1C, with significant decrease  
175 in OGG1 fluorescence compared to TGF- $\beta$ 1. To investigate myofibroblast transition, TGF-B1-stimulated  
176 HFL-1 cells were analyzed for TH5487-mediated inhibition to myofibroblasts in a transwell assay (Figure  
177 1D). Interestingly, TH5487 significantly reduced this myofibroblast transition ( $P < 0.001$ ) compared to  
178 TGF- $\beta$ 1-stimulated HFL-1 cells.

179

### 180 **Intraperitoneal TH5487 maintained murine weight following bleomycin administration**

181 We next investigated TH5487-mediated Ogg1 inhibition *in vivo* using a mouse model of pulmonary  
182 fibrosis. Mice received a one-off intratracheal administration of bleomycin (2.5 U/kg) and were dosed (IP)  
183 with TH5487 or dexamethasone 1h post-bleomycin administration, followed by additional dosing once per  
184 day, in five-day intervals, over a total period of 21 days (Figure 2A). Body weights were recorded as a  
185 proxy for murine health status (Figure 2B). Mice in the bleomycin/vehicle group lost  $26.5 \pm 9.1$  % total  
186 bodyweight, whilst mice in remaining groups either maintained their bodyweight or gained significant  
187 weight compared to the bleomycin/vehicle group over the experiment timeline.

188

### 189 **TH5487 treatment reduced cytokine levels *in vivo***

190 The effect of TH5487 treatment on inflammatory cytokine levels was investigated from the *in vivo* study  
191 using a 23-cytokine multiplex assay (Supp. Figure 1-3). Cytokines were assessed in lung tissue homogenate,  
192 BALF, and plasma (Figure 3 A-C). TH5487 treatment significantly reduced the levels of several bleomycin-  
193 induced inflammatory cytokines, including those in the BALF such as IL-9, eotaxin, MIP-1 $\alpha$  ( $*P < 0.05$ ),  
194 MIP-1 $\beta$  and IL-5 ( $**P < 0.01$ ), and KC ( $***P < 0.005$ ), whilst cytokines from the plasma displaying a  
195 reduction include IL-5 and MIP-1 $\beta$  ( $*P < 0.05$ ), IL-17 and RANTES ( $**P < 0.01$ ), and eotaxin  
196 ( $****P < 0.001$ ). Further, similar reductions in the lung homogenate were seen following TH5487  
197 administration in particular in MIP-1 $\alpha$ , KC, and IL-9 ( $*P < 0.05$ ) and IL-2 ( $**P < 0.01$ ). Additionally, TGF-  
198  $\beta$ 1 levels were measured in the BALF, plasma, and lung homogenate of murine samples (Figure 3D).  
199 TH5487-treated samples displayed significantly less TGF- $\beta$ 1 than in vehicle/bleomycin samples as  
200 compared by one-way ANOVA ( $*P < 0.05$ ;  $**P < 0.01$ ;  $***P < 0.005$ ). Plasma leakage into the BALF as a  
201 proxy for lung damage was assessed by BCA assay (Figure 3E). TH5487-treated samples displayed  
202 significantly lower albumin levels compared to vehicle/bleomycin samples as assessed by one-way  
203 ANOVA ( $**P < 0.01$ ;  $***P < 0.005$ ).

## 204 **TH5487 treatment reduced immune cell infiltration into the airways *in vivo***

205 We next investigated the effects of TH5487 treatment on immune cell infiltration into the airways by  
206 performing flow cytometry on BALF fluid obtained from the *in vivo* studies. Decreases in neutrophil count  
207 and inflammatory macrophages were seen following TH5487 administration compared to  
208 vehicle/bleomycin samples (Figure 4A and B). Giemsa-Wright-stained BALF samples showed bleomycin-  
209 treated macrophages were enlarged, displaying an inflammatory phenotype not seen in mice treated with  
210 TH5487 (Figure 4C).

211

## 212 **TH5487 treatment decreased bleomycin-induced lung damage *in vivo***

213 Next, TH5487's impact on bleomycin-induced lung damage was investigated using histological analysis of  
214 whole lung sections obtained from the *in vivo* studies (Supp. Figure 4 and 5). Bleomycin-treated control  
215 mice displayed significant lung damage when compared to saline-treated controls (Figure 5A and B).  
216 Bleomycin-treated mice that received TH5487 treatment showed reduced lung damage, with lesser degrees  
217 of alveolar structural collapse, less septal thickening of the alveoli, and less immune cell influx as indicated  
218 by the H&E stain (Figure 5A). Picrosirius red staining revealed a reduced level of collagen deposition in  
219 TH5487-treated versus control-treated mice (Figure 5B). Positive pixel analysis was used to quantify lung  
220 damage and showed significantly less H&E and picrosirius red staining in the TH 5487-administered lungs,  
221 with no significant decreases in either staining reported for dexamethasone-treated lungs (Figure 5A and  
222 B). Further, scanning electron microscopy analysis (SEM) revealed collagen deposition surrounding the  
223 alveolar walls of bleomycin control mice was reduced in response to TH5487 treatment (Figure 5C).  
224 Immunofluorescent staining of murine lung sections revealed decreased myeloperoxidase (MPO),  
225 fibronectin, COL1A1, and OGG1 staining compared to the vehicle bleomycin control group (Figure 5D).  
226 To further support the involvement of OGG1 in fibrotic related lung damage, co-staining was carried out  
227 on murine lung sections, revealing increased COL1A1/OGG1 fluorescence in similar lung areas (Figure  
228 5E).

229

## 230 **Discussion**

231 IPF is an interstitial lung disease characterized by dysregulated inflammation, progressive lung scarring,  
232 and eventual death due to respiratory complications (1, 21). Importantly, uncontrolled lung injury is a  
233 hallmark of IPF initiation and progression, resulting in pro-inflammatory and pro-fibrotic cytokine release  
234 driving further fibrosis-related immune cell influx and ECM remodeling (16, 22, 23). Ensuing TGF- $\beta$   
235 production following lung injury results in the upregulation of tissue repair genes, including the DNA base  
236 excision repair gene OGG1 (14, 24, 25). Previously reported data indicate that OGG1 is increased in lung  
237 epithelial cells and fibroblasts following TGF- $\beta$  stimulation addition (10).

238 Although studies showing *in vitro* and *in vivo* involvement of OGG1 in various pathologies, this is to the  
239 best of our knowledge, the first reported evidence of OGG1-targeting using a clinically relevant  
240 pharmacological agent. The approach reported in this study utilizes a potent and selective small molecule  
241 employing a novel and distinct mechanism of action, preventing OGG1 from binding damaged DNA,  
242 initiating transcription factors, and upregulating pro-inflammatory and pro-fibrotic pathways (18).

243 Abnormal wound healing of the alveolar epithelium in response to micro-injuries plays a crucial role in IPF  
244 progression (26–28). To test whether TH5487 inhibits relevant lung-resident epithelial and fibroblast cells,

245 A549, BEAS 2B, HFL-1, and murine lung fibroblast cells were included in wound healing assays. TH5487  
246 significantly reduced migration and wound healing compared to TGF- $\beta$  controls in all tested cell types. In  
247 addition, myofibroblast transition is vital to ECM remodeling, leading to lung tissue rigidity and decreased  
248 breathing capacity (29). In this regard, HFL-1 myofibroblast transition and proliferation was significantly  
249 decreased following TH5487 treatment.

250 Whilst increased myofibroblast number has been directly linked with IPF progression, fibrotic markers such  
251 as collagen, fibronectin, and  $\alpha$ -SMA have additionally been linked with ECM deposition and IPF  
252 progression (30, 31). In this study, we show that collagen, fibronectin, and  $\alpha$ -SMA are reduced by TH5487  
253 treatment in murine lung fibroblast cells stimulated with TGF- $\beta$ , whilst dexamethasone reduced collagen  
254 and  $\alpha$ -SMA but importantly did not decrease fibronectin. Fibronectin is a crucial ECM glycoprotein  
255 abundantly expressed by fibroblasts, mediating migration and proliferation of myofibroblasts (32).  
256 Transition of fibroblasts to myofibroblasts is additionally associated with transcriptional upregulation of  
257 profibrotic genes. The effects of TH5487 on transcription of  $\alpha$ -smooth muscle actin ( $\alpha$ -SMA) and collagen  
258 (Col1A1) in TGF- $\beta$ 1 stimulated HFL-1 cells were investigated by qPCR. TH5487, 10  $\mu$ M significantly  
259 reduced transcription of Col1A1 and  $\alpha$ -SMA while TH5487 at 5  $\mu$ M reduced mRNA levels of  $\alpha$ -SMA in  
260 TGF- $\beta$ 1 stimulated cells. Furthermore, immunofluorescence revealed a significant and specific decrease in  
261 OGG1 expression following TH5487 treatment, a decrease not seen in TGF- $\beta$  or dexamethasone controls.  
262 Importantly, this confirms the potent and specific activity of TH5487 to decrease OGG1 in fibrosis-inducing  
263 cells.

264 In this study, *in vivo* efficacy of TH5487 was tested using an intratracheal bleomycin model of fibrotic lung  
265 damage. Bleomycin-induced fibrosis in C57BL/6 mice is reproducible, only affects the lungs, and is widely  
266 used, allowing generation of comparative results (20, 33). Previous studies have shown significant fibrotic-  
267 associated weight loss in this model (34), an effect confirmed in this study. Murine weight-loss was  
268 significantly higher in groups not receiving TH5487 or dexamethasone, indicative of the protective effects  
269 offered by both treatments.

270 Mechanistic studies using this model, incorporated pro-inflammatory cytokine measurement of various  
271 lung environments. BALF, plasma, and lung homogenate displayed significantly decreased levels of a pro-  
272 inflammatory and pro-fibrotic cytokines. Specifically, macrophage-recruiting cytokines such as MIP-1 $\alpha$   
273 were significantly reduced in the BALF and lung homogenate samples, whilst neutrophil-recruiting MIP-  
274 1 $\beta$  (CCL4), KC/CXCL 1, and eotaxin were all reduced following TH5487 treatment.

275 Interleukin-5 (IL-5) was significantly decreased in the BALF and plasma of TH5487-treated mice. Involved  
276 in numerous inflammatory processes in the lungs including IPF (35), IL-5 displays chemoattractant  
277 properties for eosinophils, immune cells providing sources of TGF- $\beta$  and MCP-1 (36, 37). IL-9 was also  
278 significantly decreased in both BALF and lung homogenate of TH 5487-treated mice. IL-9 is Th2 cytokine  
279 implicated in fibrosis, acting via receptors on macrophages, T/B lymphocytes, and mast cells. High levels  
280 of IL-9 have been found in both macrophages and CD4-positive cells in patients with IPF, with IL-9  
281 blockade displaying decreased levels of silica-induced lung fibrosis (38). Additionally, TGF- $\beta$ 1 was shown  
282 to be reduced in murine BALF, plasma, and lung homogenate following TH5487 treatment as compared to  
283 vehicle/bleomycin treated mice. Elevated TGF- $\beta$ , a potent inducer of ECM production and key mediator of  
284 lung fibrosis, is directly linked to increases in collagen synthesis and deposition (39).

285 Furthermore, increases in the permeability of the pulmonary vasculature and plasma protein leakage have  
286 been linked to the development of pulmonary fibrosis (40). Plasma leakage into the BALF as a marker for  
287 lung damage was assessed by the measurement of murine albumin content in the BALF. Murine albumin  
288 content was significantly decreased in the BALF following TH5487 treatment as compared to



289 vehicle/bleomycin treated mice indicative of decreased lung damage (41). Taken together, lung injury is  
290 accompanied by inflammatory cytokine production, inflammatory cell infiltration, and ensuing fibrosis  
291 (42), processes which may be ablated by TH5487 treatment.

292 To test this, inflammatory cell influx was measured in murine BALF via flow cytometry. Interestingly,  
293 fewer neutrophils and significantly fewer inflammatory macrophages were seen in TH5487-treated samples  
294 compared to both dexamethasone/bleomycin and vehicle/bleomycin samples. Giemsa-Wright stains of  
295 BALF further elucidated the increase in inflammatory macrophage numbers in the bleomycin-treated  
296 samples compared to TH5487/bleomycin samples. Inflammatory cell incursion into the lung environment  
297 plays a role in IPF progression and severity (16, 43), with limitation of lung inflammation providing a  
298 potential source of IPF limitation.

299 Histological analysis of TH5487 murine lung samples revealed significantly decreased levels of collagen  
300 deposition in lung tissues compared to vehicle/bleomycin treated samples. Furthermore, H&E staining of  
301 lung samples indicated significant reduction in lung damage and alveolar structural collapse. Further, SEM  
302 analysis of TH5487-treated samples revealed decreased thickening of alveolar walls and decreased  
303 collagenous deposition compared to vehicle/bleomycin controls. These results provide indicative *in vivo*  
304 data of fibrosis reduction following TH5487 treatment. Immunofluorescent staining of fibrotic related  
305 proteins revealed decreased levels of both fibronectin and COL1A1 following TH5487 treatment.  
306 Additional staining for neutrophil-associated myeloperoxidase (MPO) revealed decreases in neutrophil  
307 influx into the lung environment following TH5487 treatment, as supported by similar neutrophil decreases  
308 in the BALF flow cytometric analyses. Subsequent co-staining for OGG1/COL1A1 indicates strong  
309 signalling of both proteins in similar areas of the murine lung, with both OGG1 and COL1A1 decreased  
310 following TH5487 treatment compared to both vehicle/bleomycin and dexamethasone/bleomycin groups.

311 TH5487 possesses a novel mechanism of action involving upstream gene-targeting of *OGG1* using a small  
312 molecule inhibitor. This study further elucidates the downstream effects of this approach, decreasing  
313 myofibroblast transition, epithelial and fibroblast migration, inflammatory cell recruitment, and eventual  
314 inhibition of fibrotic-related lung remodelling. These data strongly support TH5487 use in clinical trials for  
315 IPF treatment.

316

## 317 **Declarations**

### 318 **Funding sources**

319 The work was supported by grants from the Swedish Research Council, the Swedish Heart and Lung  
320 Foundation, the Swedish Government Funds for Clinical Research (ALF), the Swedish Foundation for  
321 Strategic Research, and the Alfred Österlund Foundation.

### 322 **Acknowledgement**

323 We would like to acknowledge the assistance received from the IQ Biotechnology Platform (Lund  
324 University).

### 325 **Authorship contribution statement**

326 **Lloyd Tanner:** Investigation, data curation, writing - review & editing, writing - original draft; **Andrew**  
327 **B. Single:** Investigation, data curation, writing - review & editing; **Ravi K.V. Bhongir:** Investigation,  
328 writing - review & editing; **Riya Oomen:** investigation, data curation; **Olov Wallner:** Compound design;

329 **Christina Kalderen:** Conceptualization, funding acquisition; **Thomas Helleday:** Conceptualization,  
330 compound design, funding acquisition; **Arne Eggesten:** Supervision, conceptualization, funding acquisition,  
331 writing - review & editing.

## References

1. Raghu G, Collard HR, Egan JJ, Martinez FJ, Behr J, Brown KK, Colby T V, Cordier J-F, Flaherty KR, Lasky JA, Lynch DA, Ryu JH, Swigris JJ, Wells AU, Ancochea J, Bouros D, Carvalho C, Costabel U, Ebina M, Hansell DM, Johkoh T, Kim DS, King Jr TE, Kondoh Y, Myers J, Müller NL, Nicholson AG, Richeldi L, Selman M, Dudden RF, Griss BS, Protzko SL, Schünemann HJ, Fibrosis AC on IP. 2011. An official ATS/ERS/JRS/ALAT statement: idiopathic pulmonary fibrosis: evidence-based guidelines for diagnosis and management. *Am J Respir Crit Care Med* 183:788–824.
2. Chang X, Xing L, Wang Y, Yang C-X, He Y-J, Zhou T-J, Gao X-D, Li L, Hao H-P, Jiang H-L. 2020. Monocyte-derived multipotent cell delivered programmed therapeutics to reverse idiopathic pulmonary fibrosis. *Sci Adv* 6:eaba3167.
3. Raghu G, Flaherty KR, Lederer DJ, Lynch DA, Colby T V, Myers JL, Groshong SD, Larsen BT, Chung JH, Steele MP, Benzaquen S, Calero K, Case AH, Criner GJ, Nathan SD, Rai NS, Ramaswamy M, Hagemeyer L, Davis JR, Gauhar UA, Pankratz DG, Choi Y, Huang J, Walsh PS, Neville H, Lofaro LR, Barth NM, Kennedy GC, Brown KK, Martinez FJ. 2019. Use of a molecular classifier to identify usual interstitial pneumonia in conventional transbronchial lung biopsy samples: a prospective validation study. *Lancet Respir Med* 7:487–496.
4. Martinez FJ, Collard HR, Pardo A, Raghu G, Richeldi L, Selman M, Swigris JJ, Taniguchi H, Wells AU. 2017. Idiopathic pulmonary fibrosis. *Nat Rev Dis Prim* 3:17074.
5. Kim HJ, Perlman D, Tomic R. 2015. Natural history of idiopathic pulmonary fibrosis. *Respir Med* 109:661–670.
6. Landi C, Bergantini L, Cameli P, d’Alessandro M, Carleo A, Shaba E, Rottoli P, Bini L, Bargagli E. 2020. Idiopathic Pulmonary Fibrosis Serum proteomic analysis before and after nintedanib therapy. *Sci Rep* 10:9378.
7. Lederer DJ, Martinez FJ. 2018. Idiopathic pulmonary fibrosis. *N Engl J Med* 378:1811–1823.
8. Mora AL, Rojas M, Pardo A, Selman M. 2017. Emerging therapies for idiopathic pulmonary fibrosis, a progressive age-related disease. *Nat Rev Drug Discov* 16:755.
9. Guo L, Karoubi G, Duchesneau P, Aoki FG, Shutova M V, Rogers I, Nagy A, Waddell TK. 2018. Interrupted reprogramming of alveolar type II cells induces progenitor-like cells that ameliorate pulmonary fibrosis. *NPJ Regen Med* 3:1–13.
10. Wang Y, Chen T, Pan Z, Lin Z, Yang L, Zou B, Yao W, Feng D, Huangfu C, Lin C, Wu G, Ling H, Liu G. 2020. 8-Oxoguanine DNA glycosylase modulates the cell transformation process in pulmonary fibrosis by inhibiting Smad2/3 and interacting with Smad7. *FASEB J* 34:13461-13473.
11. Zhang S, Li J, Li Y, Liu Y, Guo H, Xu X. 2017. Nitric oxide synthase activity correlates with OGG1 in ozone-induced lung injury animal models. *Front Physiol* 8:249.
12. Pan L, Wang H, Luo J, Zeng J, Pi J, Liu H, Liu C, Ba X, Qu X, Xiang Y, Boldogh I, Qin X. 2019. Epigenetic regulation of TIMP1 expression by 8-oxoguanine DNA glycosylase-1 binding to DNA:RNA hybrid. *FASEB J* 33:14159–14170.
13. Selman M, King Jr TE, Pardo A. 2001. Idiopathic pulmonary fibrosis: prevailing and evolving hypotheses about its pathogenesis and implications for therapy. *Ann Intern Med* 134:136–151.

14. Sheppard D. 2015. Epithelial-mesenchymal interactions in fibrosis and repair. Transforming growth factor- $\beta$  activation by epithelial cells and fibroblasts. *Ann Am Thorac Soc* 12 Suppl 1:S21–S23.
15. Tang N, Zhao Y, Feng R, Liu Y, Wang S, Wei W, Ding Q, An MS, Wen J, Li L. 2014. Lysophosphatidic acid accelerates lung fibrosis by inducing differentiation of mesenchymal stem cells into myofibroblasts. *J Cell Mol Med* 2013/11/19. 18:156–169.
16. Wynn TA, Ramalingam TR. 2012. Mechanisms of fibrosis: therapeutic translation for fibrotic disease. *Nat Med* 18:1028–1040.
17. Luo J, Hosoki K, Bacsi A, Radak Z, Hegde ML, Sur S, Hazra TK, Brasier AR, Ba X, Boldogh I. 2014. 8-Oxoguanine DNA glycosylase-1-mediated DNA repair is associated with Rho GTPase activation and  $\alpha$ -smooth muscle actin polymerization. *Free Radic Biol Med* 2014/03/26. 73:430–438.
18. Visnes T, Cázares-Körner A, Hao W, Wallner O, Masuyer G, Loseva O, Mortusewicz O, Wiita E, Sarno A, Manoilov A, Astorga-Wells J, Jemth A-S, Pan L, Sanjiv K, Karsten S, Gokturk C, Grube M, Homan EJ, Hanna BMF, Paulin CBJ, Pham T, Rasti A, Berglund UW, von Nicolai C, Benitez-Buelga C, Koolmeister T, Ivanic D, Iliev P, Scobie M, Krokan HE, Baranczewski P, Artursson P, Altun M, Jensen AJ, Kalderén C, Ba X, Zubarev RA, Stenmark P, Boldogh I, Helleday T. 2018. Small-molecule inhibitor of OGG1 suppresses proinflammatory gene expression and inflammation. *Science* (80- ) 362:834 LP – 839.
19. Tashiro J, Rubio GA, Limper AH, Williams K, Elliot SJ, Ninou I, Aidinis V, Tzouveleakis A, Glassberg MK. 2017. Exploring animal models that resemble idiopathic pulmonary fibrosis. *Front Med* 4:118.
20. Tanner L, Single AB. 2019. Animal Models Reflecting Chronic Obstructive Pulmonary Disease and Related Respiratory Disorders: Translating Pre-Clinical Data into Clinical Relevance. *J Innate Immun* 12:203–225.
21. Lee SB, Kalluri R. 2010. Mechanistic connection between inflammation and fibrosis. *Kidney Int Suppl* S22–S26.
22. Upagupta C, Shimbori C, Alsilmi R, Kolb M. 2018. Matrix abnormalities in pulmonary fibrosis. *Eur Respir Rev* 27:180033.
23. Wuyts WA, Agostini C, Antoniou KM, Bouros D, Chambers RC, Cottin V, Egan JJ, Lambrecht BN, Lories R, Parfrey H, Prasse A, Robalo-Cordeiro C, Verbeken E, Verschakelen JA, Wells AU, Verleden GM. 2013. The pathogenesis of pulmonary fibrosis: a moving target. *Eur Respir J* 41:1207 LP – 1218.
24. Shi L, Dong N, Fang X, Wang X. 2016. Regulatory mechanisms of TGF- $\beta$ 1-induced fibrogenesis of human alveolar epithelial cells. *J Cell Mol Med* 2016/07/15. 20:2183–2193.
25. Hakem R. 2008. DNA-damage repair; the good, the bad, and the ugly. *EMBO J* 27:589–605.
26. Molina-Molina M, Machahua-Huamani C, Vicens-Zygmunt V, Llatjós R, Escobar I, Sala-Llinas E, Luburich-Hernaiz P, Dorca J, Montes-Worboys A. 2018. Anti-fibrotic effects of pirfenidone and rapamycin in primary IPF fibroblasts and human alveolar epithelial cells. *BMC Pulm Med* 18:63.
27. Fernandez IE, Eickelberg O. 2012. New cellular and molecular mechanisms of lung injury and fibrosis in idiopathic pulmonary fibrosis. *Lancet* 380:680–688.

28. King Jr TE, Pardo A, Selman M. 2011. Idiopathic pulmonary fibrosis. *Lancet* 378:1949–1961.
29. Rangarajan S, Bone NB, Zmijewska AA, Jiang S, Park DW, Bernard K, Locy ML, Ravi S, Deshane J, Mannon RB, Abraham E, Darley-Usmar V, Thannickal VJ, Zmijewski JW. 2018. Metformin reverses established lung fibrosis in a bleomycin model. *Nat Med* 24:1121–1127.
30. Hu B, Phan SH. 2013. Myofibroblasts. *Curr Opin Rheumatol* 25:71–77.
31. Phan SH. 2008. Biology of fibroblasts and myofibroblasts. *Proc Am Thorac Soc* 5:334–337.
32. Beyeler J, Katsaros C, Chiquet M. 2019. Impaired Contracture of 3D Collagen Constructs by Fibronectin-Deficient Murine Fibroblasts. *Front Physiol* 10:166.
33. Walters DM, Kleeberger SR. 2008. Mouse Models of Bleomycin-Induced Pulmonary Fibrosis. *Curr Protoc Pharmacol* 40:5.46.1-5.46.17.
34. Egger C, Cannet C, Gérard C, Jarman E, Jarai G, Feige A, Suply T, Micard A, Dunbar A, Tigani B, Beckmann N. 2013. Administration of Bleomycin via the Oropharyngeal Aspiration Route Leads to Sustained Lung Fibrosis in Mice and Rats as Quantified by UTE-MRI and Histology. *PLoS One* 8:e63432.
35. Boomars KA, Wagenaar SS, Mulder PG, van Velzen-Blad H, Van den Bosch JM. 1995. Relationship between cells obtained by bronchoalveolar lavage and survival in idiopathic pulmonary fibrosis. *Thorax* 50:1087–1092.
36. Zhang K, Gharaee-Kermani M, Jones ML, Warren JS, Phan SH. 1994. Lung monocyte chemoattractant protein-1 gene expression in bleomycin-induced pulmonary fibrosis. *J Immunol* 153:4733 LP – 4741.
37. Zhang K, Flanders KC, Phan SH. 1995. Cellular localization of transforming growth factor-beta expression in bleomycin-induced pulmonary fibrosis. *Am J Pathol* 147:352–361.
38. Sugimoto N, Suzukawa M, Nagase H, Koizumi Y, Ro S, Kobayashi K, Yoshihara H, Kojima Y, Kamiyama-Hara A, Hebisawa A, Ohta K. 2018. IL-9 Blockade Suppresses Silica-induced Lung Inflammation and Fibrosis in Mice. *Am J Respir Cell Mol Biol* 60:232–243.
39. Yue X, Shan B, Lasky JA. 2010. TGF- $\beta$ : Titan of Lung Fibrogenesis. *Curr Enzym Inhib* 6:10.2174/10067.
40. Shea BS, Probst CK, Brazee PL, Ratile NJ, Blasi F, Weinreb PH, Black KE, Sosnovik DE, Van Cott EM, Violette SM, Caravan P, Tager AM. 2017. Uncoupling of the profibrotic and hemostatic effects of thrombin in lung fibrosis. *JCI insight* 2:e86608.
41. Knipe RS, Probst CK, Lagares D, Franklin A, Spinney JJ, Brazee PL, Grasberger P, Zhang L, Black KE, Sakai N, Shea BS, Liao JK, Medoff BD, Tager AM. 2018. The Rho Kinase Isoforms ROCK1 and ROCK2 Each Contribute to the Development of Experimental Pulmonary Fibrosis. *Am J Respir Cell Mol Biol* 58:471–481.
42. Phan SH, Kunkel SL. 1992. Lung Cytokine Production in Bleomycin-Induced Pulmonary Fibrosis. *Exp Lung Res* 18:29–43.
43. Butler MW, Keane MP. 2019. The Role of Immunity and Inflammation in IPF Pathogenesis BT - Idiopathic Pulmonary Fibrosis: A Comprehensive Clinical Guide, p. 97–131. *In* Meyer, KC, Nathan, SD (eds.). Springer International Publishing, Cham.

## Figures

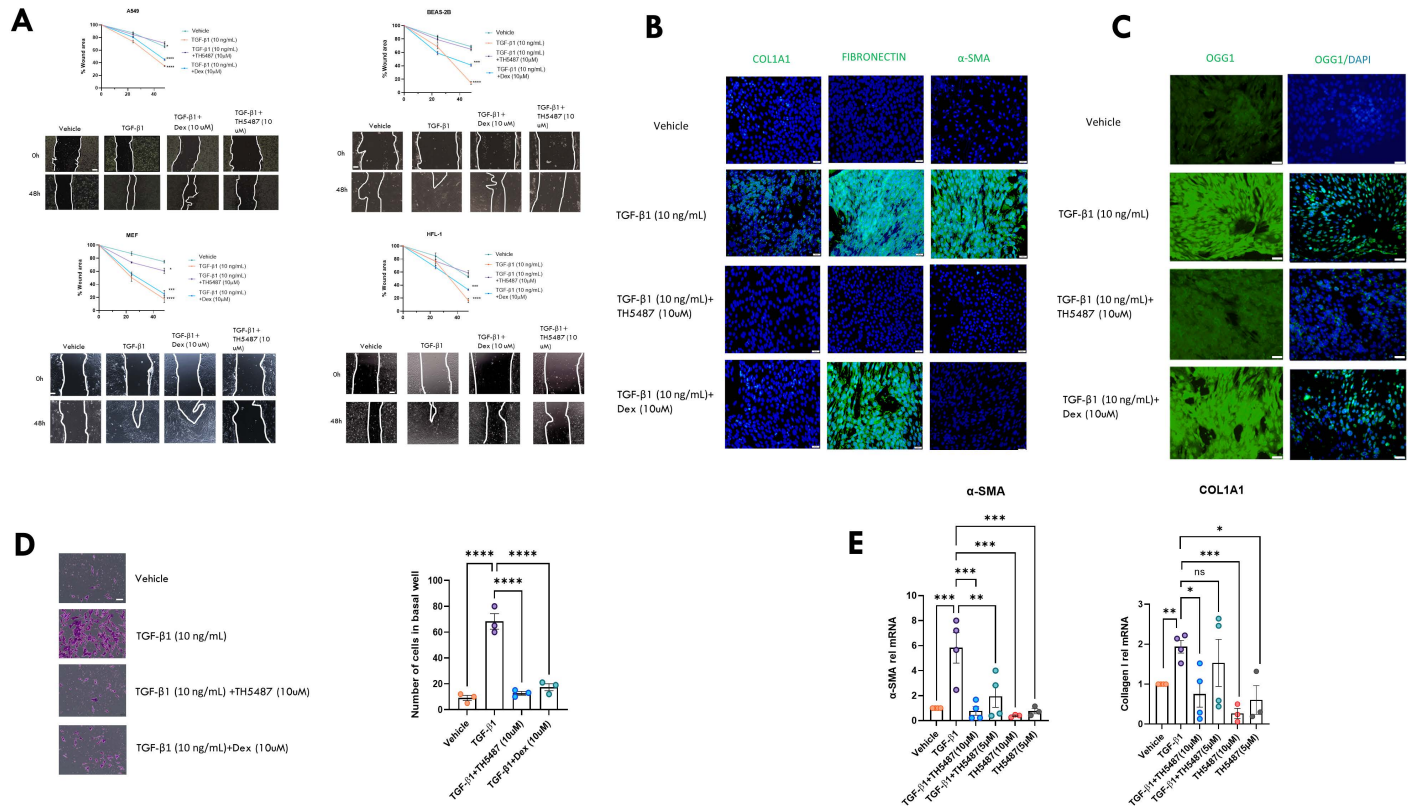

**Figure 1: *In vitro* wound healing assay (A), immunofluorescence and myofibroblast transition assay using human lung fibroblast (HFL-1) cells (B-D), and qPCR of HFL-1 cells following TGF-β1 stimulation. (A)** Migration of A549, mouse lung fibroblast (MEF), BEAS2B, and human lung fibroblast cells (HFL-1) was measured at 0, 24, and 48 h post-wound induction. Cells were treated with 10 ng/mL of TGF-β1 or an equivalent concentration of DMSO in control samples. Wound area percentage was compared to the control samples using a one-way ANOVA followed by a Dunnett's post-hoc test: \* $P < 0.05$ ; \*\*\* $P < 0.0005$  \*\*\*\* $P < 0.0001$ . Data is representative of 3 independent experiments containing 4 biological replicates (scale bar=100 μm). Immunostaining of myofibroblast cells (B and C) following 96h of TGF-β1 treatment, with TH5487 treatment displaying visually reduced levels of collagen (COL1A1), fibronectin, and alpha smooth muscle actin (α-SMA) with similarly reduced levels of OGG1 compared to no treatment/TGF-β1 control (green fluorescence; scale bar=50 μm). (D) Myofibroblast transition of human lung fibroblast cells was measured over 96h. HFL-1 cells in the basal well were stained and counted, with significantly more myofibroblast cells appearing in the untreated control well. Drug treated experiment samples were compared to untreated control samples using a one-way ANOVA followed by a Dunnett's post-hoc test: \*\*\*\* $P < 0.0001$ . Data is representative of 3 independent experiments containing 4 biological replicates (scale bar=100 μm). (E) The effects of TH5487 on transcription of α-SMA and COL1A1 in TGF-β1 stimulated HFL-1 cells were investigated by qPCR. TH5487 (10 μM), significantly reduced transcription of COL1A1 and α-SMA, with data representative of 3 independent experiments.

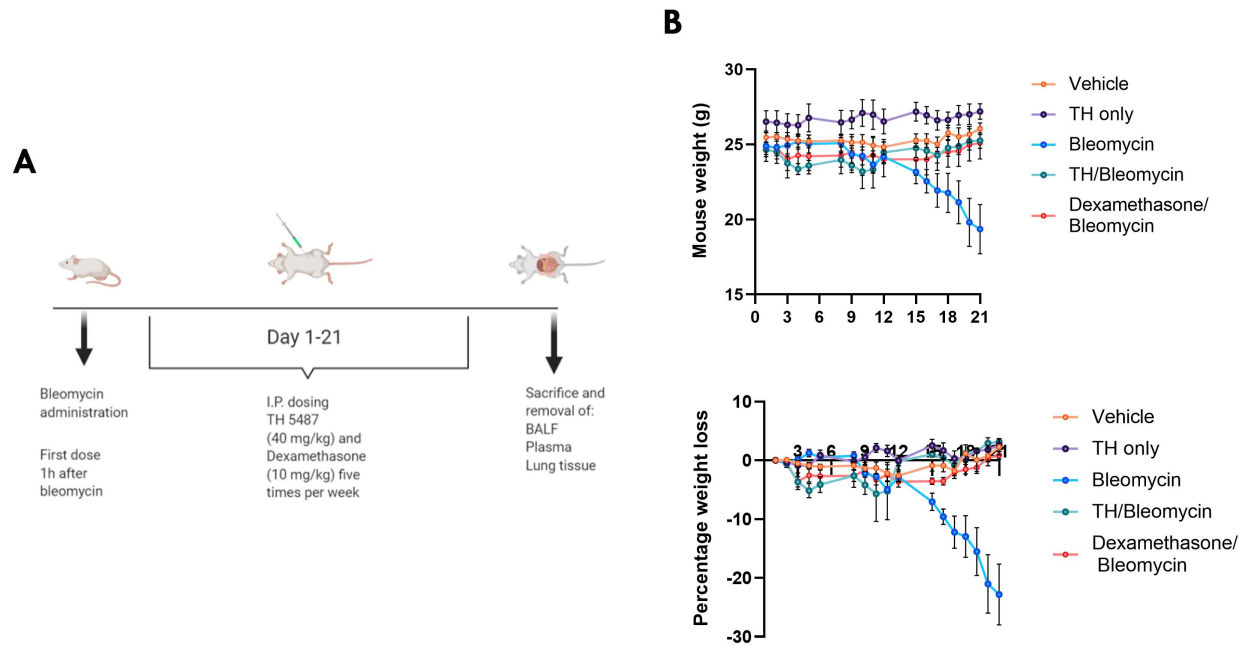

**Figure 2: TH5487 murine dosing strategy and weights.** (A) Mice received intratracheally administered bleomycin (2.5 U/kg) and were subsequently dosed (IP) with TH5487 or dexamethasone 1h post-bleomycin administration. Intraperitoneal (i.p.) dosing occurred five times per week, over the course of 21 days, followed by euthanasia and removal of BALF, plasma, and lung tissues. (B) Mice receiving bleomycin showed weight loss up until day 10, where after those dosed with TH5847 picked up significant amounts of weight compared to the vehicle/bleomycin group.

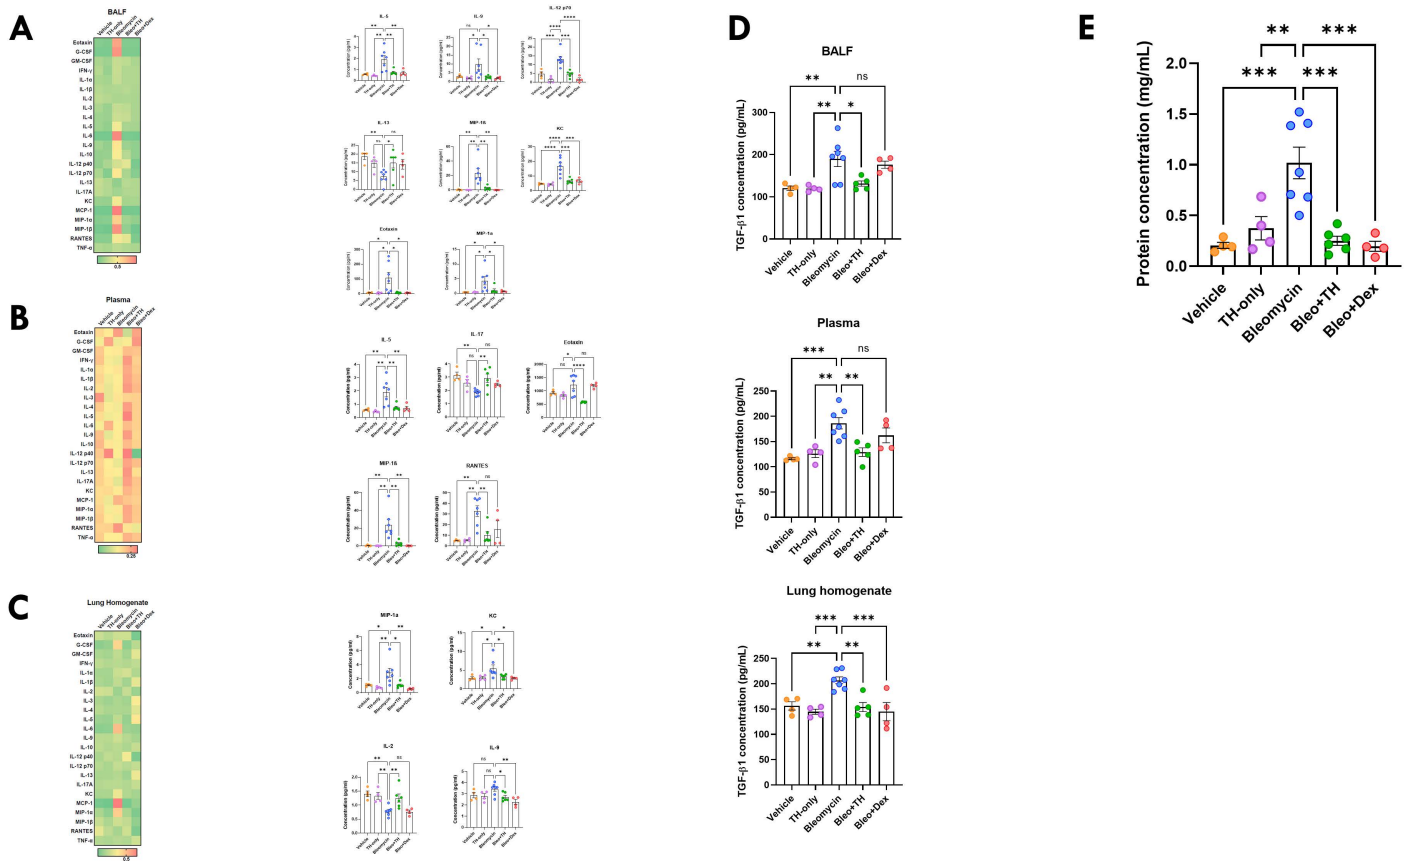

**Figure 3: Significantly decreased murine cytokines following TH5487 (IP) administration, with accompanying markers of lung damage.** Heatmaps (A-C) showing the differences in cytokine levels in murine BALF, plasma, and lung homogenate (Red-high value; Green-low value) with corresponding significantly decreased or increased cytokine levels alongside. Cytokine values were compared to the vehicle/bleomycin group using a one-way ANOVA ( $*P<0.05$ ;  $**P<0.01$ ;  $***P<0.005$ ;  $****P<0.001$ ). TGF-β1 ELISA (D) conducted on murine BALF, plasma, and lung homogenate revealed significantly decreased TGF-β1 levels in all three murine sample types with values compared to the vehicle/bleomycin group using a one-way ANOVA ( $*P<0.05$ ;  $**P<0.01$ ;  $***P<0.005$ ). Murine albumin content (E) was measured in BALF samples as a marker for plasma leakage, with TH5487 treatment significantly decreasing albumin content in the BALF compared to the vehicle/bleomycin group.



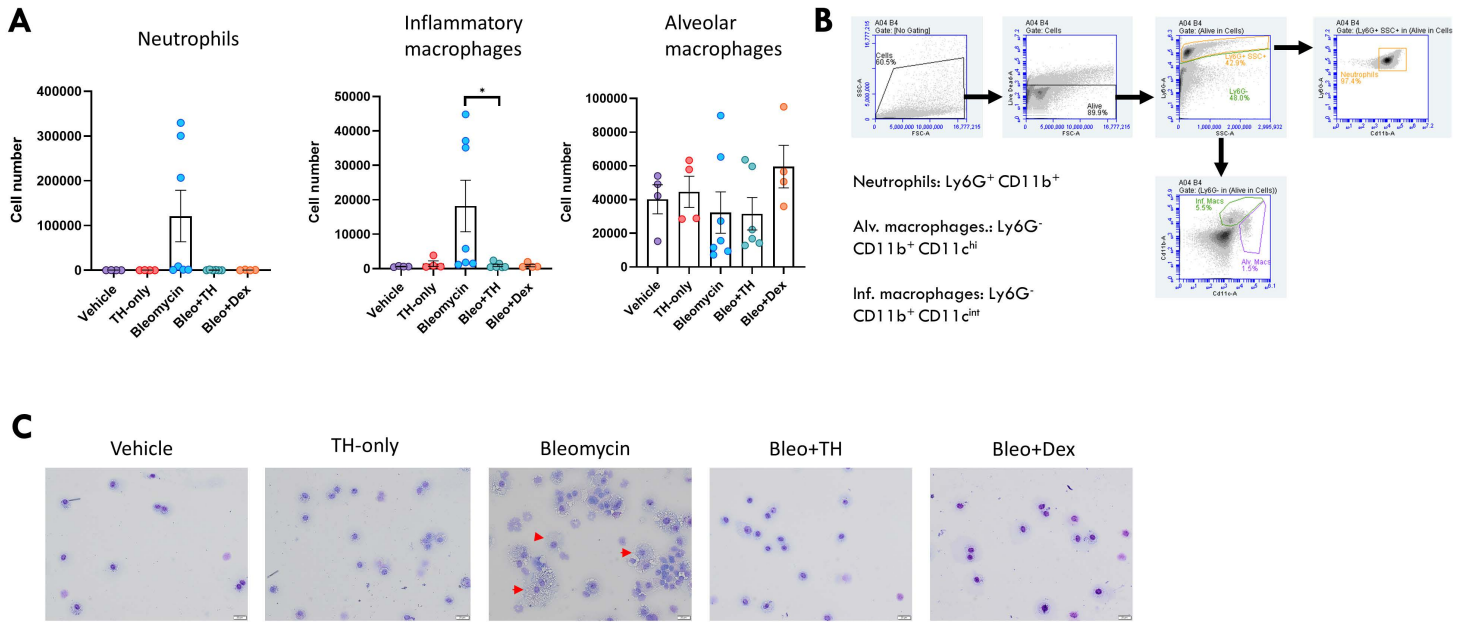

**Figure 4: Inflammatory cell influx measured in murine BALF.** Murine BALF was assessed for neutrophils, alveolar macrophages, and inflammatory macrophages (A) using flow cytometry, with the representative gating strategy depicted alongside (B). Decreased numbers of neutrophils and inflammatory macrophages were detected in response to TH5487 (IP) treatment, with no significant difference reported between the neutrophils and inflammatory macrophages of mice treated with dexamethasone. No significant differences were reported for alveolar macrophage numbers. Inflammatory cell numbers were compared to the vehicle/bleomycin group using a one-way ANOVA ( $*P < 0.05$ ). (C) Cytospin Giemsa-Wright stained slides showing vehicle/bleomycin BALF samples containing enlarged inflammatory macrophages, with TH5487 treatment reducing the presence of inflammatory macrophages, whilst the corticosteroid dexamethasone similarly reduced inflammatory macrophage influx comparable to (G) vehicle treated control samples. Scale bar=20  $\mu$ m.

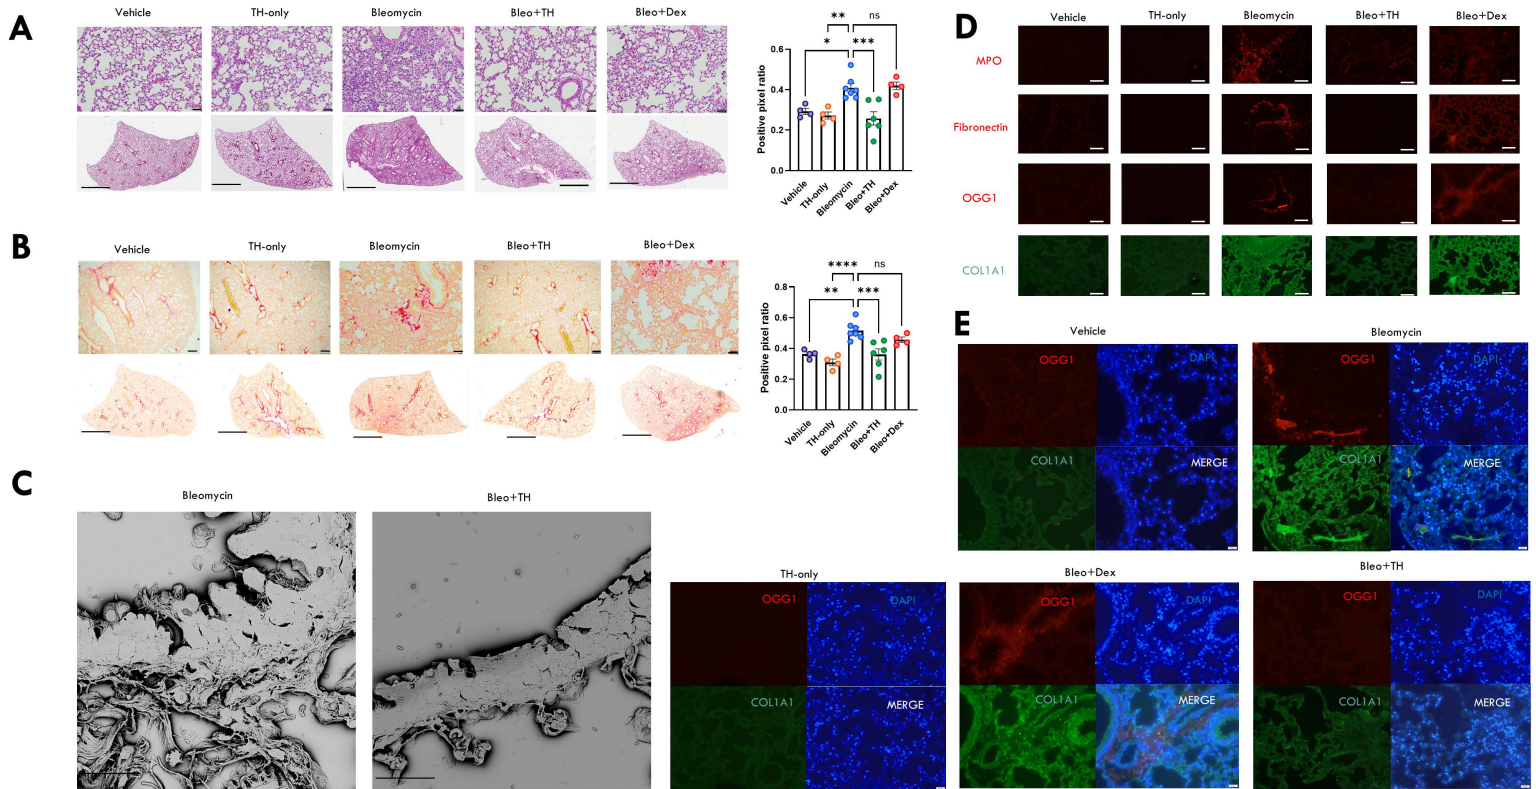

**Figure 5: Murine lung staining, scanning electron microscopy (SEM), and immunofluorescence show reduced levels of fibrotic-related lung damage following TH5487 treatment compared to vehicle/bleomycin samples. (A)** TH5487 significantly decreased lung damage (H&E) and (B) collagen deposition (picrosirius red) in both macroscopic and microscopic structures compared to vehicle/bleomycin lungs and was confirmed by positive pixel analysis of whole-lung scanned images (scale bar of microscopic image=100  $\mu$ m; scale bar of whole lung scan=2 mm). Statistical analyses were conducted using a one-way ANOVA (\* $P$ <0.05; \*\* $P$ <0.01; \*\*\* $P$ <0.005). (C) TH5487 (i.p.)/bleomycin SEM images show reduced collagen deposition in the alveolar borders compared to bleomycin-treated controls (scale bar=20  $\mu$ m). Immunofluorescent staining of murine lung slices (D) revealed decreased levels of myeloperoxidase (MPO), fibronectin, OGG1, and COL1A1 following TH5487 treatment compared to both vehicle/bleomycin and dexamethasone/bleomycin groups (scale bar=50  $\mu$ m). (E) Co-stained murine lung samples revealed corresponding increases in OGG1 and COL1A1 following bleomycin administration, with reduced levels of both OGG1 and COL1A1 in TH5487-treated samples (scale bar=50  $\mu$ m).
